# Supplementary material for: DDX56 modulates post-transcriptional Wnt signaling through miRNAs and is associated with early recurrence in squamous cell lung carcinoma
Source: PubMed Central journal article supplement (PMC8393456; doi:10.1186/s12943-021-01403-w), 2021-08-26
Supplement: 12943_2021_1403_MOESM1_ESM.pdf [file 12943_2021_1403_MOESM1_ESM.pdf]

## **DDX56 modulates post-transcriptional Wnt signaling through miRNAs and is associated with early recurrence in squamous cell lung carcinoma**

Qingqing Wu, Xiaoyang Luo, Mikkel G Terp, Qingrun Li, Yuan Li, Lei Shen, Ying Chen, Kirstine Jacobsen, Trever G. Bivona, Haiquan Chen, Rong Zeng, Henrik J. Ditzel.

### **Supplementary Methods**

#### ***Proteomic analysis***

Tumor tissue samples from paired SqCLC patients in cohort1 were homogenized in SDT lysis buffer (4% SDS, 0.1M Tris-HCl pH 7.6, 0.1M DTT) using a Tissue Lyser II (Qiagen). Protein concentrations were determined by tryptophan fluorescence emission at 350 nm using an excitation wavelength of 295 nm [1]. A modified Filter Aided Sample Preparation (FASP) (compatible with iTRAQ labeling) was used for tissue digestion [2]. iTRAQ (isobaric tagging for relative and absolute quantification)-based quantitative proteomics was performed to determine the differential expression of proteins between the two patient tumor groups. To reduce technical bias of different channels, each two pairs of samples were labeled with 4-plex iTRAQ reagents (Applied Biosystems) in both orders (forward and reverse). The iTRAQ-labeled samples were mixed and fractionated on Agilent 1100 HPLC using SCX column. Six fractions were eluted using pH gradient elution buffer and desalted. The SCX-fractionated peptides were re-suspended in 0.1% FA solution and separated on a self-packed reversed phase tip column (75  $\mu\text{m}$   $\times$  150 mm; C18, 3  $\mu\text{m}$ ) using a 240 min gradient at a flow rate of 300 nL/min. LTQ Orbitrap velos was conducted in data-dependent acquisition mode

using a “high–high” strategy (high mass accuracy and resolution both on precursor and product ion mass). Full MS scans and HCD (higher energy collisional dissociation)-MS/MS scans for the ten most intense ions in each full MS scan were acquired at a resolution of 30,000 and 7500, respectively.

Protein identification was performed using Mascot 2.2.2 (Matrix Science) software. Each MS/MS spectrum searched against a concatenated version of the forward and reversed human UniProt fasta database. Maximum false discovery rates (FDR) were 0.01 at both peptide and protein levels. Quantitative ratios for peptides and proteins were obtained using Buildsummary software [3]. For the protein ratio, the median was calculated over all distinct peptides assigned to the protein subgroup, and both forward and reverse order quantitative data were considered. A median protein iTRAQ ratio of each replicates was normalized to 1.

The entire statistical analysis for the proteomic samples was based on the log<sub>2</sub>-values of the protein ratios. The Wilcoxon signed rank test was performed using R (version 3.2.0) to identify significant differentially-expressed proteins between the two patient groups, and the p-value was calculated. Both fold-change and p-values were considered in data analysis.

### ***Cell culture and transfection***

The human SqCLC cell line H226 and SK-MES-1 were purchased from ATCC and the Cell Bank of Type Culture Collection of Chinese Academy of Sciences (CBTCCAS), respectively. H226 cells were grown in RPMI 1640 medium (61870036, Invitrogen)

with 10% FBS, and SK-MES-1 cells were grown in MEM medium (11090081, Invitrogen) with 10% FBS, 1% Glutamax (35050061, Invitrogen), 1% Non-essential Amino Acids (11140050, Invitrogen), and 1% Sodium Pyruvate 100 mM Solution (11360070, Invitrogen). All cells were maintained at 37 °C in humidified air with 5% CO<sub>2</sub>. All cell lines were free of mycoplasma contamination at the time of the experiments as determined by MycoAlert™ Mycoplasma Detection Kit. DDX56 siRNA #1 (SI00361781), DDX56 siRNA #2 (SI04238157), and negative control siRNA (SI03650318) were purchased from Qiagen (Hilden, Germany). DGCR8 siRNA and negative control siRNA were purchased from Genepharma (Shanghai, China). Transient knockdown of DDX56 was performed using two different DDX56 siRNAs (siDDX56-1 and siDDX56-2) individually or in combination (siDDX56-m) and compared to cells transfected with a scrambled siRNA (negative control, siNC). Stable knockdown of DDX56 in H226 or SK-MES-1 cells was performed by using MISSION shRNA lentiviral transduction particles targeting DDX56 (SHCLNV-NM\_019082, Sigma-Aldrich) according to the manufacturer's instruction. MISSION pLKO.1-puro non-target shRNA control transduction particles (SHC016V, Sigma-Aldrich) were used to generate a control H226 or SK-MES-1 cell line. miR-378i mimic, miR-378a-3p mimic, miRNA mimic negative control, miRNA-378a-3p inhibitor and miRNA inhibitor negative control were purchased from Genepharma.

### ***Western blotting***

Tissues were homogenized in SDT lysis buffer (4%SDS, 0.1M Tris-HCl pH7.6, 0.1 M

DTT) using a Tissue Lyser II (Qiagen). Protein concentrations were determined by tryptophan fluorescence emission at 350 nm using an excitation wavelength of 295 nm. Cells were harvested using a cell scraper and lysed in RIPA lysis buffer (50 mM Tris 7.5, 150 mM NaCl, 1% NP-40, 0.5% sodium deoxycholate, 0.1% SDS). Total protein concentration was quantified by BCA assay. The extracted proteins from tissue or cell samples were separated on 12% SDS-PAGE and electroblotted onto PVDF membranes, which were then blocked in TBST buffer (Tris-buffered saline containing 0.1% Tween-20) containing 5% BSA for 1 hour at room temperature, and incubated with primary antibody anti-DDX56 (1:1000, sc-393078, Santa Cruz, CA, USA), anti- $\beta$ -actin (1:5000, ab6276, Abcam), anti-GAPDH (1:3000, sc-25778, Santa Cruz, CA, USA), anti-HSP90 (1:1000, #4874, Cell Signaling Technology), anti- $\beta$ -Catenin (1:1000, #8480, Cell Signaling Technology), or anti-Wnt-2b (1:200, sc-166502, Santa Cruz, CA, USA) in TBST buffer containing 5% BSA overnight at 4°C. The membranes were then washed with TBST and incubation with goat anti-mouse, goat anti-rabbit, or chicken anti-goat HRP-conjugated secondary antibody (Santa Cruz) in TBST buffer for 2 hours at room temperature, followed by washing in TBST buffer prior to visualization of immunoreactive bands using an ECL Prime Western Blot kit (GE Healthcare) and ImageQuant LAS4000 (Fujifilm).

### ***Tissue microarray (TMA) and immunohistochemistry (IHC)***

TMA sections were deparaffinized, rehydrated, and endogenous peroxidase quenched with 0.3% hydrogen peroxide (v/v). Antigen retrieval was performed by heating the

sections for 10 min in antigen retrieval reagents (Beyotime Institute Biotech, Shanghai, China) in a microwave oven. After antigen retrieval, sections were blocked in 4% horse serum for 1 hour at room temperature, and incubated with anti-DDX56 (1:200, sc-393078, Santa Cruz, CA, USA) overnight at 4°C. After a rinse with PBST solution, the sections were incubated sequentially with HRP-rabbit anti-mouse antibody and DAB reagent (Dako Real Envision, K5007, CA, USA). Finally, sections were counterstained with Hematoxylin QS (Vector Labs, H3404, CA, USA).

### ***Cell growth assay***

Cells transfected with DDX56-specific siRNAs, control siRNAs, pCMV-DDX56 or empty pCMV vector were seeded into 24-well plates ( $4 \times 10^4$  per well) and, 24, 48 and 72 hours after transfection, cells were stained with 0.5% crystal violet stain solution. For miRNA mimic experiments, cells transfected with miR-378a-3p, miR-378i and negative control mimic ( $4 \times 10^4$  per well) were seeded into 24-well plates, stained with 0.5% crystal violet stain solution 24, 48, 72 and 96 hours after transfection, and subsequently washed with distilled water and dried in a fume hood. The stained dry cells in each well were dissolved in citrate buffer (0.1M sodium citrate in 50% ethanol) and absorbance values at 570 nm were measured using a Sunrise microplate Reader (Tecan Trading AG, Switzerland) or SpectraMax i3 Multi-Mode Microplate Reader (Molecular Devices, Sunnyvale, CA).

### ***Transwell migration assay***

Cell migration was assessed using Transwell chambers (8.0-um pore size; Corning, New York, NY). H226 and SK-MES-1 cells were transfected with DDX56-specific siRNAs or control siRNA, after which cell migration was assessed using Transwell chambers (8.0-um pore size; Corning, New York, NY). Each assay condition was performed in triplicate and performed 3 separate times. The migrating cells were counted and photographed in 5 random fields within an insert under a phase contrast microscope.

### ***Wound healing assay***

Cell migration was assessed by the ability of the cells to migrate into a cell-free area. Briefly, H226 cells transfected with DDX56-specific siRNAs or control siRNA ( $2 \times 10^5$  per well) were seeded into 12-well plates in triplicate. Cells were grown for about 24 hours to reach ~90% confluence and the monolayer was scratched with a sterile 200 $\mu$ l pipet tip across the center of the well. After wash, the wells were replenished with fresh medium and grown in an incubator. Microscope images were obtained at 0, 3, 6, 9 and 24 hours after scratch. The gap distance was measured from 3 scratches for each condition. The gap distance was measured from 3 scratches for each condition.

### ***Apoptosis assay***

A cell death detection ELISA kit (Roche) was used to investigate the effects of DDX56 reduction in H226 cells on serum deprivation-induced apoptosis. H226 cells transfected

with DDX56-specific siRNAs or control siRNA were seeded in 24-well plates (1x10<sup>5</sup> cells per well) in triplicate. After overnight incubation, the cells were deprived of serum for 72 hours and cell apoptosis was measured in accordance with the manufacturer's instructions.

### ***Capture of nascent RNAs***

The Click-it Nascent RNA Capture Kit (Invitrogen) was used to capture the nascent RNAs. Briefly, H226 cells were incubated with 0.5 mM 5-ethynyl-uridine (EtU) for 30 min, and EtU was incorporated into newly synthesized RNA. Total RNA was prepared with TRIzol reagent (Invitrogen). The EtU-labeled RNAs were biotinylated and captured by using the kit according to the manufacturer's instructions. The captured EtU-labeled and total RNA was subjected to analysis by qRT-PCR.

### ***mRNA microarray***

H226 cells transfected with DDX56 siRNA and control siRNA were incubated for 48 hours and total RNA isolated and used for the microarray analysis using Affymetrix Human U133 Plus 2.0 Arrays. Slides were scanned by GeneChip® Scanner 3000 (Cat#00-00212, Affymetrix, Santa Clara, CA, US) and Command Console Software 4.0 (Affymetrix, Santa Clara, CA, US) with default settings. Raw data were normalized by MAS 5.0 algorithm, Affy packages in R. Differentially-expressed mRNAs were identified by arbitrarily setting the threshold at a fold change of 2.

### ***miRNA microarray***

H226 cells transfected with DDX56 siRNA and control siRNA were incubated for 48 hours and miRNA isolated using miRNeasy mini kit (Qiagen) according to the manufacturer's instructions. miRNA expression profiling was conducted using the Agilent Human miRNA (8×60K) Microarray (Agilent Technologies). The arrays were washed and scanned with a laser confocal scanner (G2565BA, Agilent Technologies, Palo Alto, CA) according to the manufacturer's instructions. The intensities of fluorescence were calculated by Feature extraction software (Agilent Technologies). Differentially-expressed miRNAs were identified by arbitrarily setting the threshold at a fold change of 1.2.



**Supplementary Figures**

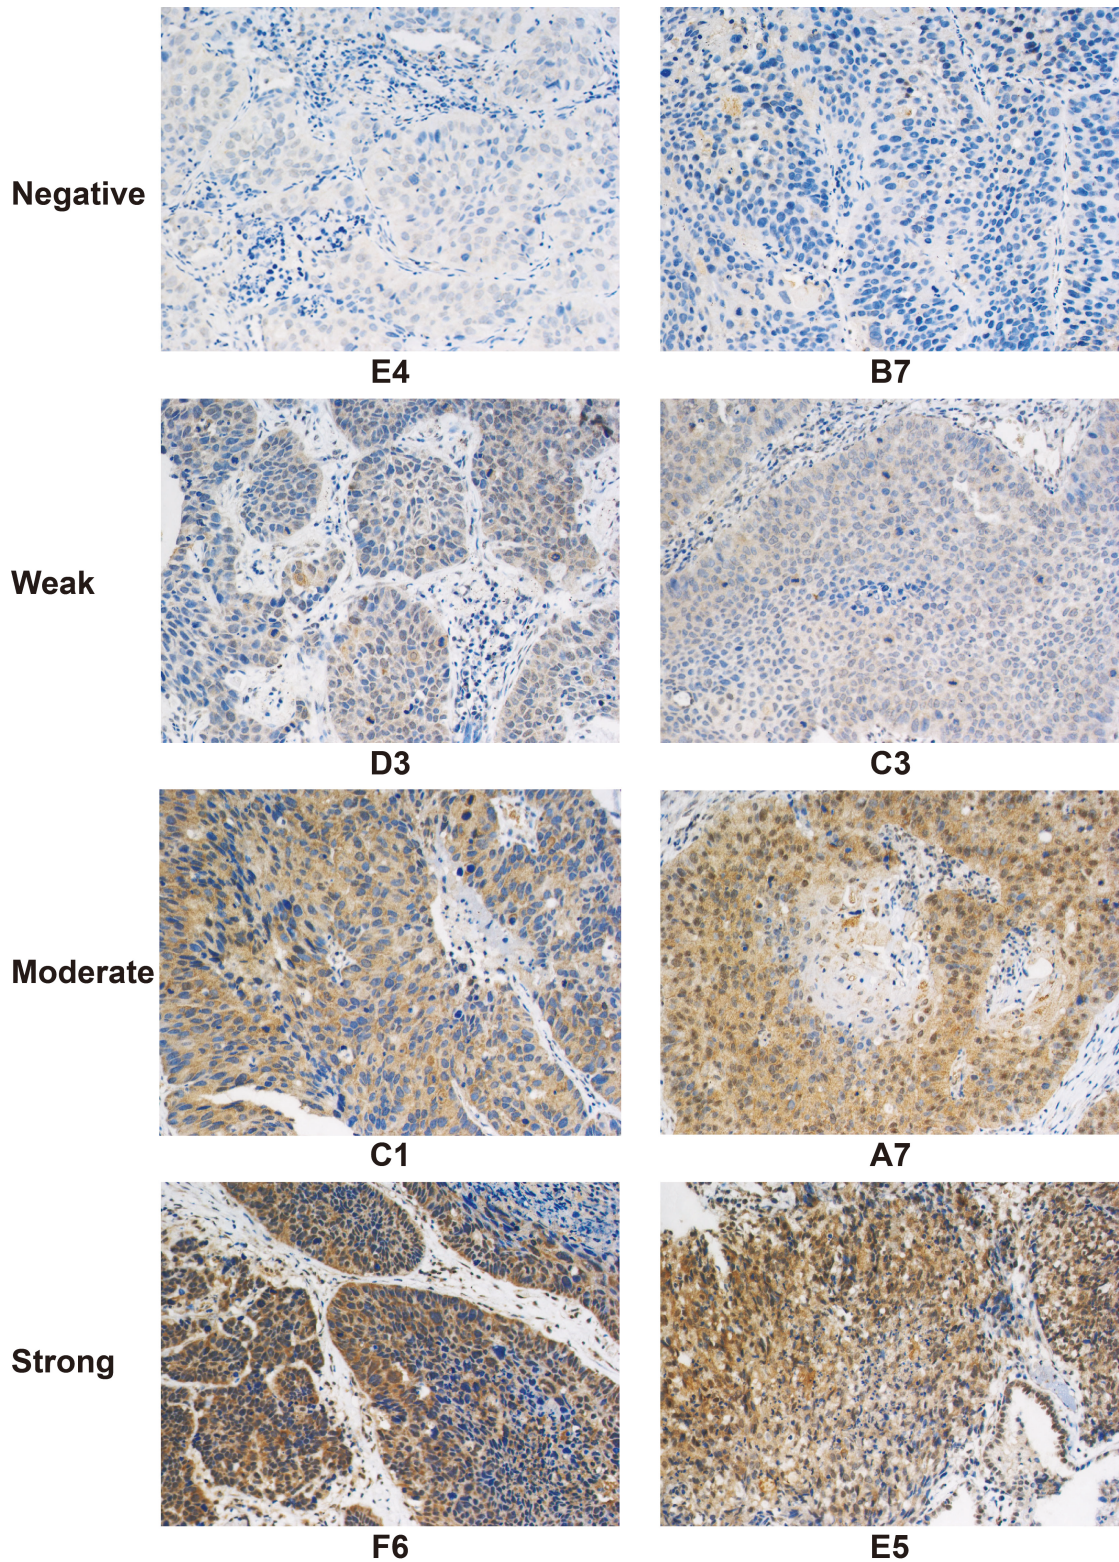

**Supplementary Figure S1. Representative immunohistochemistry images of SqCLC tissue microarray cores stained for DDX56 and exhibiting different staining intensity.**

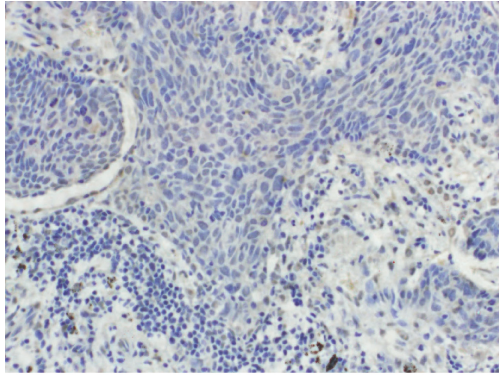

**F7**

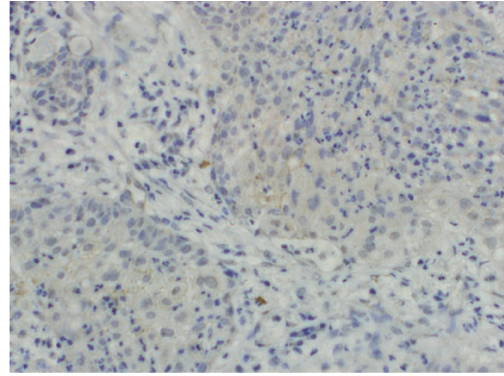

**F8**

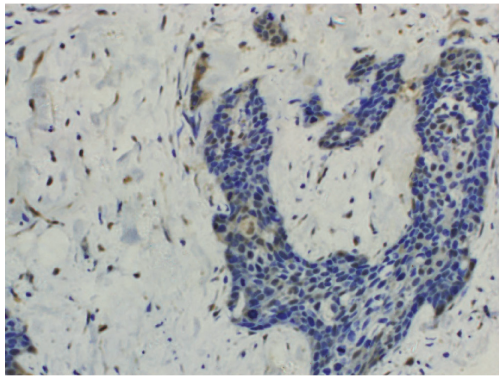

**F9**

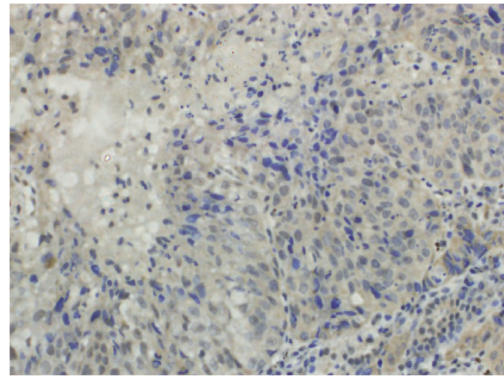

**F10**

**Supplementary Figure S2. Images of immunohistochemical staining for DDX56 in four cores of adjacent normal lung tissue.**

**A**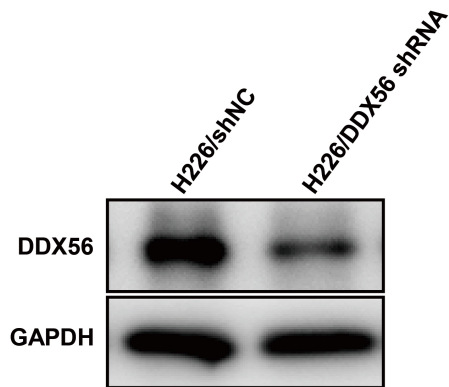**B**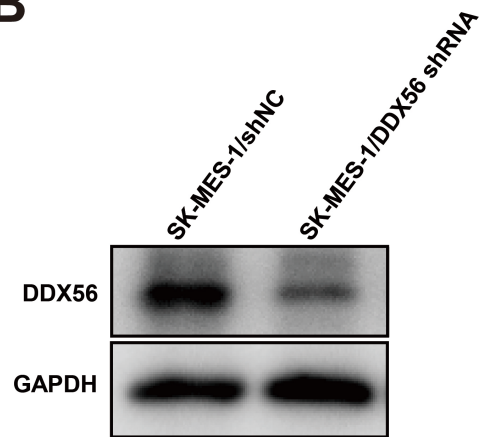**C**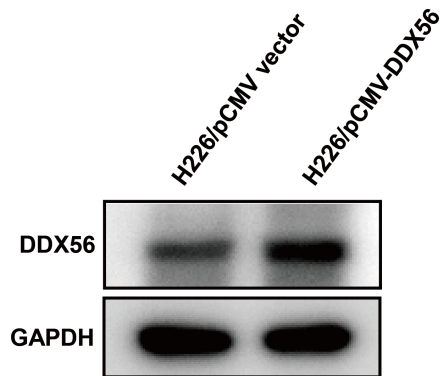**D**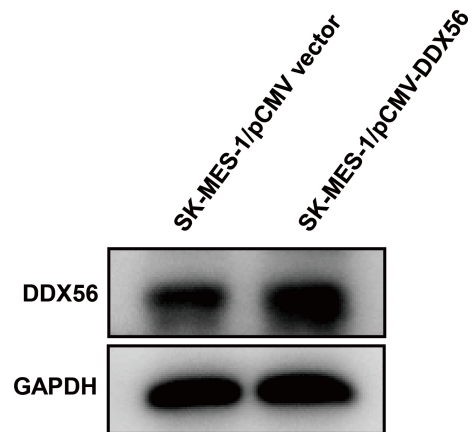

**Supplementary Figure S3. Evaluation of DDX56 silencing and overexpression in SqCLC cell lines.** **A** and **B**, DDX56 protein expression was determined by Western blotting 48h after transfection with DDX56 shRNA or control shRNA in H226 (**A**) and SK-MES-1 cells (**B**). **C** and **D**, DDX56 protein expression was determined by Western blotting 48h after transfection with pCMV-DDX56 vector or pCMV empty vector in H226 (**C**) and SK-MES-1 cells (**D**). GAPDH expression was used as a loading control.

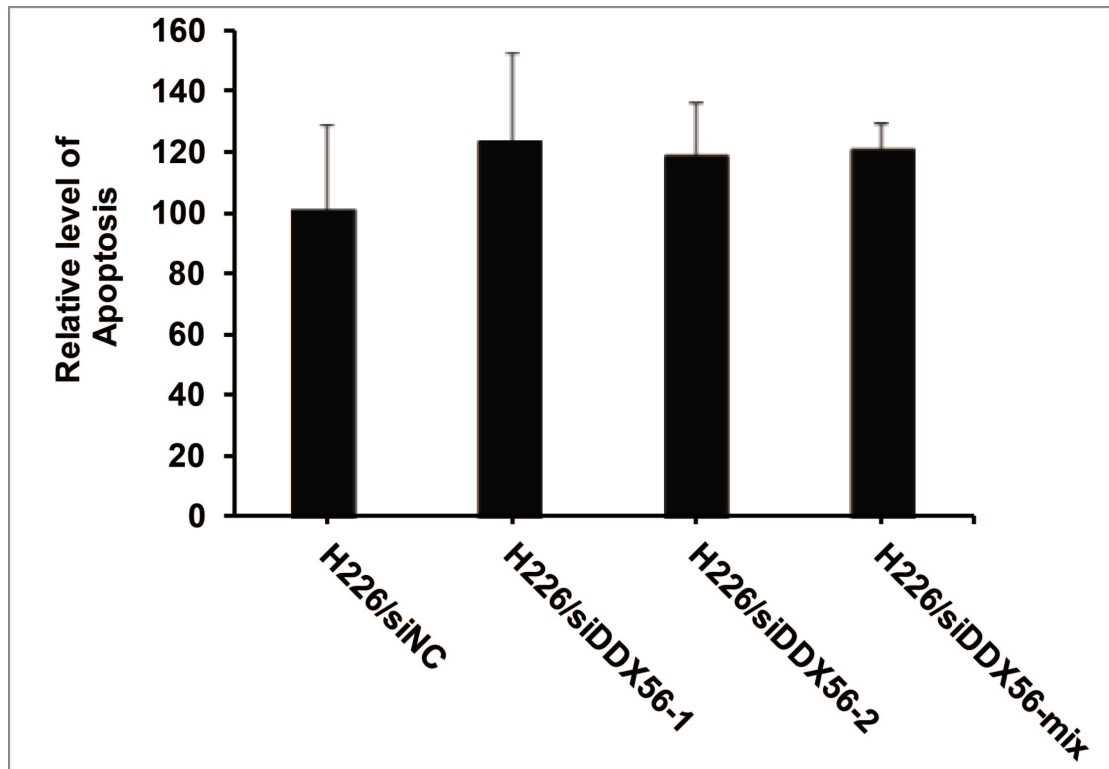

**Supplementary Figure S4. Reduction of DDX56 did not significantly affect apoptosis induced by serum-free medium.** H226 cells were transfected with control or DDX56 siRNAs. After overnight incubation, the cells were deprived of serum for 72 hours. Cell apoptosis was measured based on determination of cytoplasmic histone-associated DNA fragments. Data are shown as mean  $\pm$  SD (n=3).

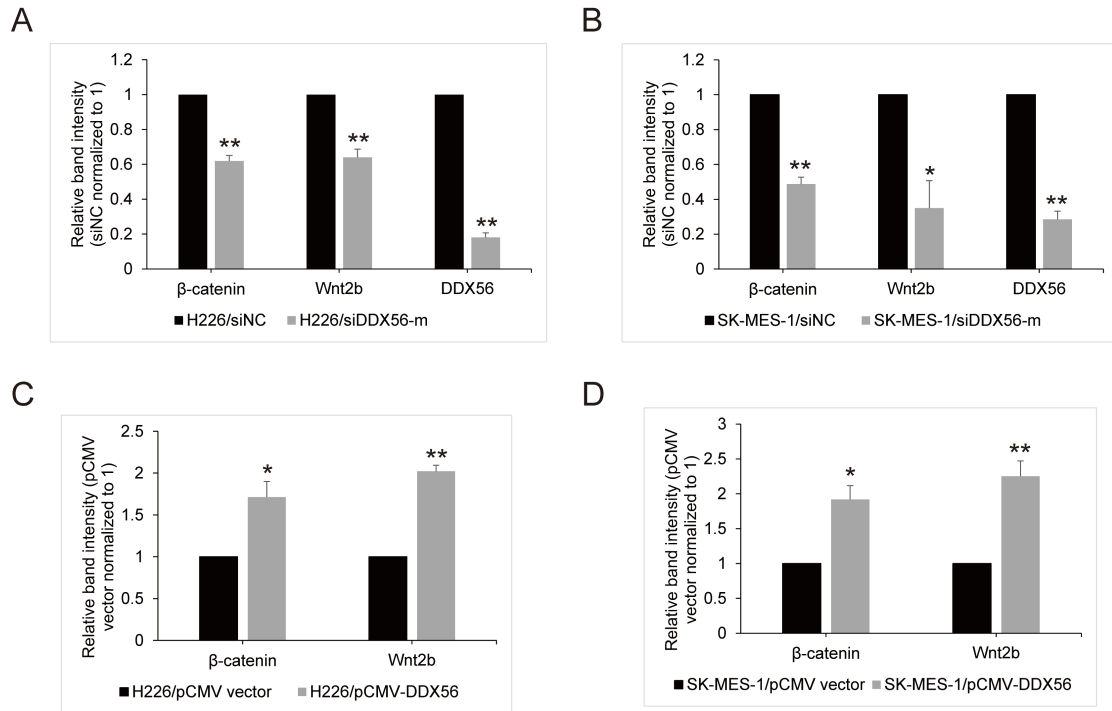

**Supplementary Figure S5. Quantification analysis of Western blots shown in Figure 4.** **A** and **B**, Quantification of Western blot analysis of β-catenin, Wnt2b, and DDX56 protein expression level in H226 and SK-MES-1 cells transfected with DDX56-specific siRNAs or control siRNA as shown in Fig. 4 D and E, confirming reduced protein expression of β-catenin and Wnt2b following DDX56 reduction in H226 (**A**) and SK-MES-1 (**B**) cells. **C** and **D**, Quantification of Western blot analysis of the expression levels of β-catenin, Wnt2b and FLAG tag-fused DDX56 protein in H226 and SK-MES-1 cells transfected with pCMV-DDX56 or control pCMV vectors as shown in Figure 4 F and G, confirming enhanced protein expression of β-catenin and Wnt2b following DDX56 overexpression in H226 (**C**) and SK-MES-1 (**D**) cells. Western blot quantification was performed using Multi Gauge software (Fujifilm). GAPDH expression was used as a loading control. Data are shown as mean ± SD (n=3, \*p < 0.05; \*\*p < 0.01).

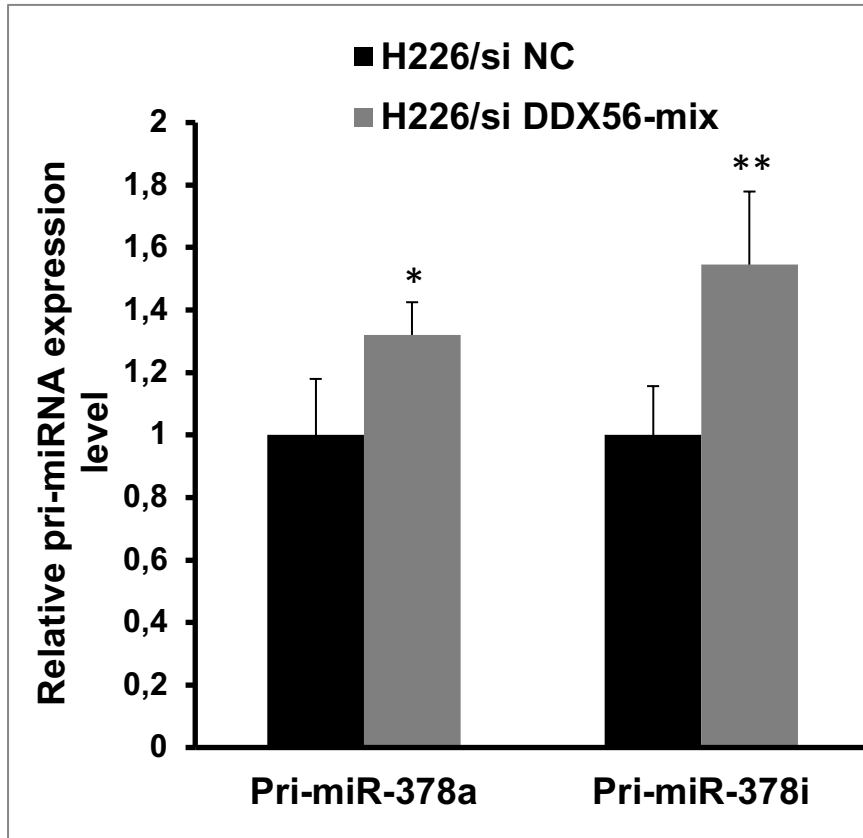

Supplementary Figure S6. qRT-PCR analysis of primary miRNA levels of miR-378a-3p and miR-378i in H226 cells transfected with DDX56-specific siRNA (si DDX56-mix) or control siRNA (si NC). GAPDH was used for normalization of the primary miRNA expression data. Data are shown as mean  $\pm$  SD (n=3).

## Supplementary Tables

**Table S1.** The clinical information of the 20 paired patients in cohort 1.

| Sample index | Sex  | Age | Smoke | TNM     | Stage | Recurrence Time (month) | Metastasis Site | Dead time (month) |
|--------------|------|-----|-------|---------|-------|-------------------------|-----------------|-------------------|
| ER1          | Male | 68  | No    | T3N2M0  | IIIa  | 5                       | brain           | 13                |
| LR1          | Male | 67  | No    | T3N2M0  | IIIa  | 42                      | lung            | 50                |
| ER2          | Male | 71  | Yes   | T2bN1M0 | IIb   | 5                       | brain           | 13                |
| LR2          | Male | 72  | Yes   | T2bN1M0 | IIb   | 50                      | brain           | 66                |
| ER3          | Male | 63  | Yes   | T2bN1M0 | IIb   | 9                       | brain           | 13                |
| LR3          | Male | 61  | Yes   | T2bN1M0 | IIb   | 40                      | bone            | 52                |
| ER4          | Male | 64  | Yes   | T3N1M0  | IIIa  | 10                      | Mediastinum     | 19                |
| LR4          | Male | 62  | Yes   | T3N1M0  | IIIa  | 46                      | lung            | 46                |
| ER5          | Male | 67  | Yes   | T3N2M0  | IIIa  | 9                       | Mediastinum     | 17                |
| LR5          | Male | 68  | Yes   | T3N2M0  | IIIa  | 55                      | Mediastinum     | 72                |
| ER6          | Male | 72  | Yes   | T2aN2M0 | IIIa  | 10                      | lung            | 19                |
| LR6          | Male | 75  | Yes   | T2aN2M0 | IIIa  | 36                      | brain           | 58                |
| ER7          | Male | 63  | Yes   | T3N1M0  | IIIa  | 10                      | bone            | 23                |
| LR7          | Male | 66  | Yes   | T3N1M0  | IIIa  | 39                      | bone            | 52                |
| ER8          | Male | 62  | Yes   | T2bN1M0 | IIb   | 9                       | lung            | 25                |
| LR8          | Male | 60  | Yes   | T2bN1M0 | IIb   | 35                      | Mediastinum     | 49                |
| ER9          | Male | 59  | Yes   | T2aN2M0 | IIIa  | 7                       | bone            | 24                |
| LR9          | Male | 60  | Yes   | T2aN2M0 | IIIa  | 36                      | Mediastinum     | 42                |
| ER10         | Male | 66  | Yes   | T3N2M0  | IIIa  | 10                      | lung            | 21                |
| LR10         | Male | 63  | Yes   | T3N2M0  | IIIa  | 46                      | bone            | 60                |

**Table S3.** Primers used for quantitative RT-PCR and cloning.

| <b>Quantitative RT-PCR primers</b> |                                          |                                     |
|------------------------------------|------------------------------------------|-------------------------------------|
| <b>Name</b>                        | <b>Forward Primer (5' to 3')</b>         | <b>Reverse Primer (5' to 3')</b>    |
| DDX56                              | CCCATCTCGCATATTAAGCCAC                   | TGTACGTCCTCGTTAAAAGTAGC             |
| CTNNB1                             | AAAGCGGCTGTTAGTCACTGG                    | CGAGTCATTGCATACTGTCCAT              |
| GAPDH                              | ACCACAGTCCATGCCATCAC                     | TCCACCACCCTGTTGCTGTA                |
| FZD7                               | CTCCCTGTGGAAAGGCATAA                     | CCTCTGGCTTAACGGTGTGT                |
| WNT2B                              | ATTCCCGCTCTGGAGATTT                      | GGTACCCTTCCTCTTGACACA               |
| 18s rRNA                           | CAGCCACCCGAGATTGAGCA                     | TAGTAGCGACGGGCGGTGTG                |
| Pri-miR-378a-3p                    | ATCTTTGCCGGCCCAACTT                      | ACCACCAGGCCATTGGATTC                |
| Pri-miR-378i                       | GTCCAGTGCTCCCTTCCAAA                     | AGCTGCTCCCTCCTTACA                  |
| miR-378a-3p                        | ACTGGACTTGGAGTCAGAAGGC                   | miScript Universal Primer           |
| miR-378i                           | ACTGGACTAGGAGTCAGAAGG                    | miScript Universal Primer           |
| RNU6B                              | CTCGCTTCGGCAGCACA                        | miScript Universal Primer           |
| <b>Cloning primers</b>             |                                          |                                     |
| <b>Name</b>                        | <b>Forward Primer (5' to 3')</b>         | <b>Reverse Primer (5' to 3')</b>    |
| DDX56                              | CGCGGATCCATGGAGGACTCTGAAGCA<br>CTGGGCTTC | CCGGAATTCGGAGGGCTTGGCTGTGG<br>GTCTG |



**Table S5. List of the top-10 up-regulated and down-regulated proteins in tumor tissues from ER patients vs. LR patients.**

| Protein name                                                         | Gene symbol | Number of paired samples showed >1.5 fold change | P-value | Protein class in The Human Protein Atlas                                                                  |
|----------------------------------------------------------------------|-------------|--------------------------------------------------|---------|-----------------------------------------------------------------------------------------------------------|
| <i>Top-10 up-regulated proteins in ER vs LR lung SCC patients</i>    |             |                                                  |         |                                                                                                           |
| Protein NDRG1                                                        | NDRG1       | 8                                                | 0.0059  | Cancer-related genes, Disease related genes, Plasma proteins, Predicted intracellular proteins            |
| Isoform 2 of Collagen alpha-1(VII) chain                             | COL7A1      | 7                                                | 0.002   | Disease related genes, Predicted intracellular proteins, Predicted secreted proteins                      |
| Methionine aminopeptidase 1                                          | METAP1      | 7                                                | 0.0098  | Enzymes, Plasma proteins, Predicted intracellular proteins                                                |
| Non-histone chromosomal protein HMG-17                               | HMGN2       | 7                                                | 0.0371  | Predicted intracellular proteins                                                                          |
| Phosphoserine aminotransferase                                       | PSAT1       | 6                                                | 0.002   | Disease related genes, Enzymes, Plasma proteins, Potential drug targets, Predicted intracellular proteins |
| Prefoldin subunit 3                                                  | VBP1        | 6                                                | 0.0039  | Predicted intracellular proteins                                                                          |
| Mitochondrial glutamate carrier 1                                    | SLC25A22    | 6                                                | 0.0059  | Disease related genes, Plasma proteins, Potential drug targets, Predicted membrane proteins, Transporters |
| Isoform 2 of Pescadillo homolog                                      | PES1        | 6                                                | 0.0098  | Predicted intracellular proteins                                                                          |
| Probable ATP-dependent RNA helicase DDX56                            | DDX56       | 6                                                | 0.0156  | Enzymes, Predicted intracellular proteins                                                                 |
| CD9 antigen                                                          | CD9         | 6                                                | 0.0195  | Cancer-related genes, CD markers, Plasma proteins, Predicted membrane proteins, Transporters              |
| <i>Top-10 down-regulated proteins in ER vs LR lung SCC patients</i>  |             |                                                  |         |                                                                                                           |
| HLA class II histocompatibility antigen, DP alpha 1 chain            | HLA-DPA1    | 9                                                | 0.0039  | Predicted intracellular proteins, Predicted membrane proteins, Predicted secreted proteins                |
| HLA class II histocompatibility antigen, DQ alpha 1 chain (Fragment) | HLA-DQA1    | 8                                                | 0.0059  | Predicted membrane proteins, Predicted secreted proteins                                                  |
| Isoform 2 of Ig mu chain C region                                    | IGHM        | 7                                                | 0.0039  | NA                                                                                                        |
| Alcohol dehydrogenase 1B                                             | ADH1B       | 7                                                | 0.0059  | Enzymes, FDA approved drug targets, Plasma proteins, Predicted intracellular proteins                     |
| HLA class II histocompatibility antigen, DR alpha chain              | HLA-DRA     | 7                                                | 0.0059  | Plasma proteins, Predicted membrane proteins                                                              |

|                                 |              |   |        |                                                                                                           |
|---------------------------------|--------------|---|--------|-----------------------------------------------------------------------------------------------------------|
| MHC class II antigen            | HLA-DQA1/DRA | 7 | 0.0059 | Predicted membrane proteins, Predicted secreted proteins                                                  |
| Immunoglobulin J chain          | IGJ          | 7 | 0.0098 | Plasma proteins, Predicted secreted proteins                                                              |
| Fructose-1,6-bisphosphatase 1   | FBP1         | 7 | 0.0137 | Disease related genes, Enzymes, Plasma proteins, Potential drug targets, Predicted intracellular proteins |
| Ig lambda chain V-III region SH | IGLV3-19     | 6 | 0.0059 | NA                                                                                                        |
| Cathepsin S                     | CTSS         | 6 | 0.0059 | Enzymes, Plasma proteins, Predicted secreted proteins                                                     |

---

**Table S6.** Cox univariate analysis showing correlations between selected clinical parameters and DDX56 IHC staining with overall survival in an independent SqCLC patient cohort (n=56).

| Variable                                               | OS Univariate Analysis<br>HR (95% CI) | <i>p</i> |
|--------------------------------------------------------|---------------------------------------|----------|
| Age ( $\geq$ 60/<60 years)                             | 1.15 (0.56-2.37)                      | 0.696    |
| Sex (female / male)                                    | 0.81 (0.19-3.42)                      | 0.778    |
| Stage ( IIIa / IIb / IIa / Ib/ Ia)                     | 1.20 (0.90-1.60)                      | 0.206    |
| Tumor Size (>3cm)                                      | 1.03 (0.48-2.21)                      | 0.945    |
| Lymphovascular invasion (yes/no)                       | 0.97 (0.49-1.90)                      | 0.918    |
| Tumor location (central type / peripheral type)        | 1.61 (0.77-3.39)                      | 0.208    |
| Smoke (yes/no)                                         | 0.71 (0.27-1.89)                      | 0.493    |
| DDX56 staining ( strong or moderate/ weak or negative) | 2.28(1.03-5.02)                       | 0.041    |

**Table S7.** Multivariate analysis showed that SqCLC patients (n=130) with high DDX56 tumor expression exhibited poor overall survival (OS) after adjustment for selected clinicopathologic characteristics.

| Variable                                 | OS Univariate        |    | <i>p</i> | OS Multivariate      |    | <i>p</i> |
|------------------------------------------|----------------------|----|----------|----------------------|----|----------|
|                                          | Analysis<br>(95% CI) | HR |          | Analysis<br>(95% CI) | HR |          |
| Age ( $\geq 60$ / $<60$ years)           | 0.93 (0.54-1.60)     |    | 0.79     | -                    |    | -        |
| Sex (female / male)                      | 0.79 (0.48-1.31)     |    | 0.36     | -                    |    | -        |
| Stage (IIIb/ IIIa / IIb / IIa / Ib/ Ia)  | 1.12(0.96-1.30)      |    | 0.17     | -                    |    | -        |
| Tumor Size (>3cm)                        | 1.18 (0.66-2.10)     |    | 0.58     | -                    |    | -        |
| Lymph node status (2/1/0)                | 1.43 (1.02-2.00)     |    | 0.036    | 1.33 (0.94-1.88)     |    | 0.10     |
| Smoke (yes/no)                           | 0.70 (0.17-2.88)     |    | 0.62     | -                    |    | -        |
| DDX56 expression ( $\geq 750$ / $<750$ ) | 2.18 (1.34–3.55)     |    | 0.0017   | 2.06 (1.26–3.37)     |    | 0.0040   |

**Table S8.** Multivariate analysis showed that lung cancer patients whose tumors overexpressed high DDX56 gene expression level exhibited poor overall survival (OS) (n=1925) and progression-free survival (PFS) (n=982) after adjustment for selected clinicopathologic characteristics.

| <b>Variable</b>       | <b>OS Multivariate Analysis<br/>HR (95% CI)</b> | <b><i>p</i></b> | <b>RFS Multivariate Analysis<br/>HR (95% CI)</b> | <b><i>p</i></b> |
|-----------------------|-------------------------------------------------|-----------------|--------------------------------------------------|-----------------|
| Grade                 | 0.99 (0.81 - 1.2)                               | 0.8876          | 0.94 (0.75 - 1.19)                               | 0.6159          |
| AJCC stage T          | 1.38 (1.14 - 1.67)                              | 0.0009          | 1.57 (1.23 - 2.01)                               | 0.0003          |
| AJCC stage N          | 1.83 (1.56 - 2.15)                              | >1E-05          | 1.61 (1.32 - 1.97)                               | >1E-05          |
| Gender                | 1.12 (0.86 - 1.44)                              | 0.4032          | 1.08 (0.79 - 1.48)                               | 0.6177          |
| Smoking history       | 0.79 (0.51 - 1.23)                              | 0.2944          | 0.84 (0.54 - 1.33)                               | 0.4628          |
| DDX56 gene expression | 1.53 (1.12 - 2.08)                              | 0.0071          | 1.45 (1.07 - 1.98)                               | 0.0174          |

**Table S9.** Top 10 overrepresented KEGG pathways among up- or down-regulated mRNAs following DDX56 silencing in mRNA microarray experiment.

| Overrepresented KEGG pathways  | Count | P-value | P-value adjusted by Benjamini |
|--------------------------------|-------|---------|-------------------------------|
| <i>Up-regulated mRNAs</i>      |       |         |                               |
| Ribosome                       | 66    | 7.3E-40 | 1.4E-37                       |
| Proteasome                     | 14    | 6.5E-03 | 4.6E-01                       |
| Parkinson's disease            | 28    | 8.5E-03 | 4.1E-01                       |
| Huntington's disease           | 35    | 1.9E-02 | 5.9E-01                       |
| Oxidative phosphorylation      | 27    | 1.9E-02 | 5.1E-01                       |
| Spliceosome                    | 26    | 2.3E-02 | 5.2E-01                       |
| Alzheimer's disease            | 31    | 3.6E-02 | 6.2E-01                       |
| tRNA biosynthesis              | 11    | 3.8E-02 | 5.9E-01                       |
| Adherens junction              | 17    | 4.2E-02 | 5.9E-01                       |
| Tight junction                 | 26    | 4.6E-02 | 5.8E-01                       |
| <i>Down-regulated mRNAs</i>    |       |         |                               |
| Cell cycle                     | 44    | 9.1E-07 | 1.7E-04                       |
| Ubiquitin mediated proteolysis | 45    | 5.5E-06 | 5.2E-04                       |
| Pathways in cancer             | 82    | 9.1E-05 | 5.8E-03                       |
| Renal cell carcinoma           | 25    | 2.5E-04 | 1.2E-02                       |
| Wnt signaling pathway          | 43    | 3.6E-04 | 1.4E-02                       |
| TGF-beta signaling pathway     | 28    | 6.6E-04 | 2.1E-02                       |
| Colorectal cancer              | 26    | 2.0E-03 | 5.3E-02                       |
| Adherens junction              | 24    | 2.8E-03 | 6.5E-02                       |
| Prostate cancer                | 26    | 4.7E-03 | 9.5E-02                       |
| Pancreatic cancer              | 22    | 5.7E-03 | 1.0E-01                       |

**Table S10.** Summary of differentially expressed miRNAs in microarray experiment.

The differentially expressed miRNAs were filtered by a fold change cutoff of 1.2 and 0.83. \*=Normalized and log<sub>2</sub>-transformed intensity data

| Systematic Name                     | H226/siDDX56-mix* | H226/siNC* | Fold Change (siDDX56 vs. siNC) | Sequence                 |
|-------------------------------------|-------------------|------------|--------------------------------|--------------------------|
| <b><i>Up-regulated miRNAs</i></b>   |                   |            |                                |                          |
| hsa-miR-6510-5p                     | 3.51              | 3.09       | 1.34                           | CAGCAGGGGAGAGAGAGGAGTC   |
| hsa-miR-378i                        | 6.44              | 6.08       | 1.29                           | ACTGGACTAGGAGTCAGAAGG    |
| hsa-miR-28-5p                       | 3.84              | 3.49       | 1.27                           | AAGGAGCTCACAGTCTATTGAG   |
| hsa-miR-1972                        | 3.01              | 2.68       | 1.26                           | TCAGGCCAGGCACAGTGGCTCA   |
| hsa-miR-34c-5p                      | 3.47              | 3.14       | 1.25                           | AGGCAGTGTAGTTAGCTGATTGC  |
| hsa-miR-6785-5p                     | 5.05              | 4.73       | 1.25                           | TGGGAGGGCGTGGATGATGGTG   |
| hsa-miR-22-5p                       | 3.57              | 3.26       | 1.24                           | AGTTCTTCAGTGGCAAGCTTTA   |
| hsa-miR-630                         | 3.52              | 3.21       | 1.24                           | AGTATTCTGTACCAGGGAAGGT   |
| hsa-miR-1973                        | 4.82              | 4.51       | 1.24                           | ACCGTGCAAAGGTAGCATA      |
| hsa-miR-1246                        | 5.49              | 5.18       | 1.23                           | AATGGATTTTTGGAGCAGG      |
| hsa-miR-7847-3p                     | 3.33              | 3.03       | 1.23                           | CGTGGAGGACGAGGAGGAGGC    |
| hsa-miR-197-3p                      | 3.82              | 3.54       | 1.21                           | TTCACCACCTTCTCCACCCAGC   |
| hsa-miR-378a-3p                     | 6.51              | 6.24       | 1.21                           | ACTGGACTTGGAGTCAGAAGGC   |
| hsa-miR-574-3p                      | 3.46              | 3.19       | 1.21                           | CACGCTCATGCACACACCCACA   |
| hsa-miR-26b-5p                      | 4.8               | 4.54       | 1.2                            | TTCAAGTAATTCAGGATAGGT    |
| hsa-miR-152-3p                      | 3.17              | 2.9        | 1.2                            | TCAGTGCATGACAGAACTTGG    |
| hsa-miR-31-5p                       | 3.8               | 3.53       | 1.2                            | AGGCAAGATGCTGGCATAGCT    |
| <b><i>Down-regulated miRNAs</i></b> |                   |            |                                |                          |
| hsa-miR-939-5p                      | 4.4               | 4.92       | 0.7                            | TGGGGAGCTGAGGCTCTGGGGGTG |
| hsa-miR-5100                        | 10.64             | 11.01      | 0.77                           | TTCAGATCCCAGCGGTGCCTCT   |
| hsa-miR-4433a-5p                    | 3.17              | 3.52       | 0.78                           | CGTCCCACCCCCACTCCTGT     |
| hsa-miR-1268b                       | 4.17              | 4.52       | 0.78                           | CGGGCGTGGTGGTGGGGGTG     |
| hsa-miR-3162-3p                     | 3.3               | 3.64       | 0.79                           | TCCCTACCCCTCCACTCCCCA    |
| hsa-miR-7114-5p                     | 5.53              | 5.81       | 0.82                           | TCTGTGGAGTGGGGTGCCTGT    |
| hsa-miR-6826-5p                     | 7.81              | 8.09       | 0.82                           | TCAATAGGAAAGAGGTGGGACCT  |
| hsa-miR-3659                        | 5.68              | 5.96       | 0.83                           | TGAGTGTGTCTACGAGGGCA     |

**Table S11.** Top 10 overrepresented KEGG pathways among predicted targets of up- or down-regulated miRNAs following DDX56 silencing in miRNA microarray experiment.

| Overrepresented KEGG pathways                            | Count | P-value | P-value adjusted by Benjamini |
|----------------------------------------------------------|-------|---------|-------------------------------|
| <i>Predicted targets of up-regulated miRNAs</i>          |       |         |                               |
| Axon guidance                                            | 36    | 1.8E-08 | 5.0E-06                       |
| Pathways in cancer                                       | 74    | 1.1E-07 | 1.6E-05                       |
| Phosphatidylinositol signaling system                    | 27    | 2.8E-06 | 2.5E-04                       |
| MAPK signaling pathway                                   | 49    | 1.3E-05 | 8.9E-04                       |
| Focal adhesion                                           | 42    | 1.4E-05 | 7.8E-04                       |
| Wnt signaling pathway                                    | 31    | 3.6E-05 | 1.7E-03                       |
| Proteoglycans in cancer                                  | 40    | 3.7E-05 | 1.5E-03                       |
| Glioma                                                   | 19    | 5.1E-05 | 1.7E-03                       |
| Signaling pathways regulating pluripotency of stem cells | 30    | 1.2E-04 | 3.7E-03                       |
| Melanoma                                                 | 19    | 1.8E-04 | 4.8E-03                       |
| <i>Predicted targets of down-regulated miRNAs</i>        |       |         |                               |
| None                                                     |       |         |                               |



## References:

1. Wisniewski JR, Ostasiewicz P, Mann M: High Recovery FASP Applied to the Proteomic Analysis of Microdissected Formalin Fixed Paraffin Embedded Cancer Tissues Retrieves Known Colon Cancer Markers. *J Proteome Res.* 2011;10(7):3040-9.
2. Abdallah C, Sergeant K, Guillier C, Dumas-Gaudot E, Leclercq CC, Renaut J: Optimization of iTRAQ labelling coupled to OFFGEL fractionation as a proteomic workflow to the analysis of microsomal proteins of *Medicago truncatula* roots. *Proteome Sci.* 2012;10(1):37.
3. Sheng Q, Dai J, Wu Y, Tang H, Zeng R: BuildSummary: using a group-based approach to improve the sensitivity of peptide/protein identification in shotgun proteomics. *J Proteome Res.* 2012;11(13):1494-1502.
